# Supplementary material for: The Dietary Total-Fat Content Affects the In Vivo Circulating C15:0 and C17:0 Fatty Acid Levels Independently
Source: MDPI journal article supplement (doi:10.3390/nu10111646), 2018-11-03
Supplement: s1 [file s1]

## **SUPPLEMENTARY INFORMATION:**

**Figure S1:** The circulating fatty acid relative composition (mol %) change in response to the three experimental diets.

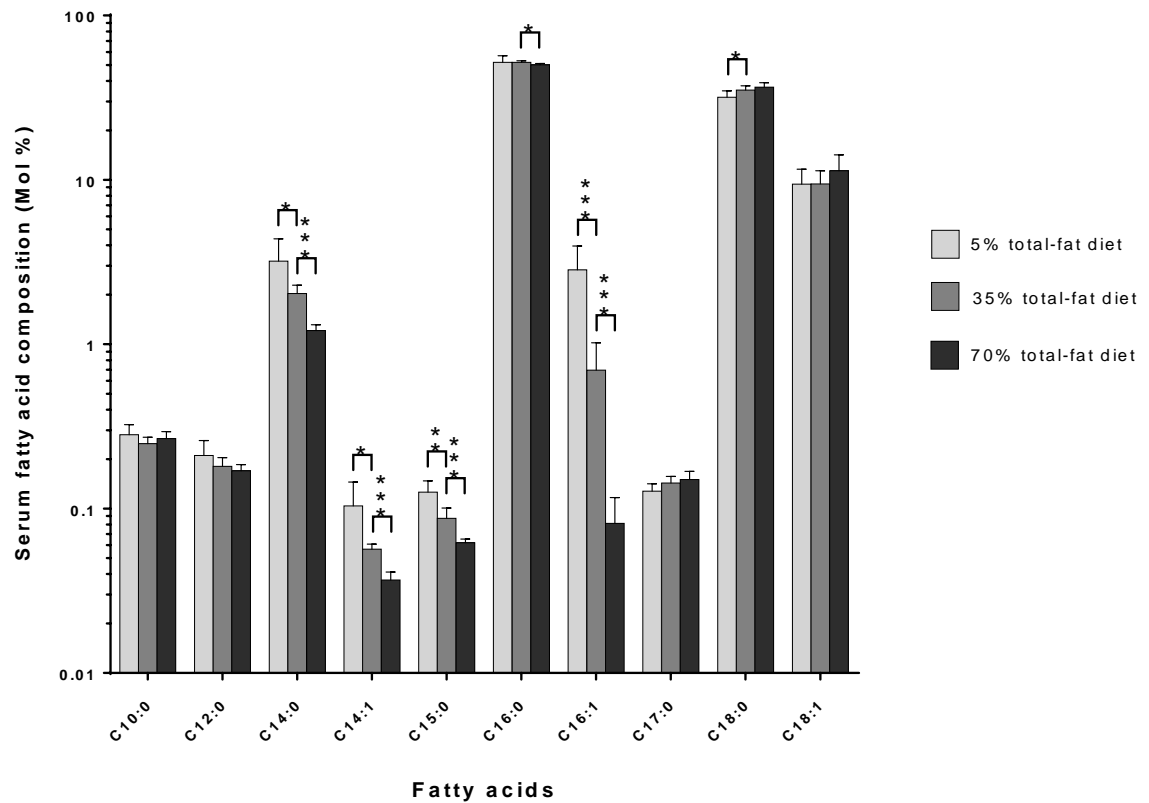

**Figure S1;** The effect of changing the amount of total-fat within the diet from 5% to 35% to 70% (% total energy) on the serum fatty acid relative compositions (mol %) whilst maintaining identical dietary fatty acid compositions across the three diets ( $n = 6-7$  per group). This is to see if the amount of fat within the diet influences the serum fatty acid relative compositions independent of the actual dietary fatty acid composition. The serum samples were analysed by gas chromatography separation with mass spectrometry detection. The significance of the difference between each group is shown by the  $p$ -value star system; where  $p \leq 0.05$  was considered statistically significant ( $p < 0.05 = *$ ,  $p < 0.01 = **$ ,  $p < 0.001 = ***$ ). Error bars represent  $\pm$  standard error of the mean.

**Figure S2:** The circulating fatty acid relative composition (mol %) change in response to the three experimental diets with two different fat formulations.

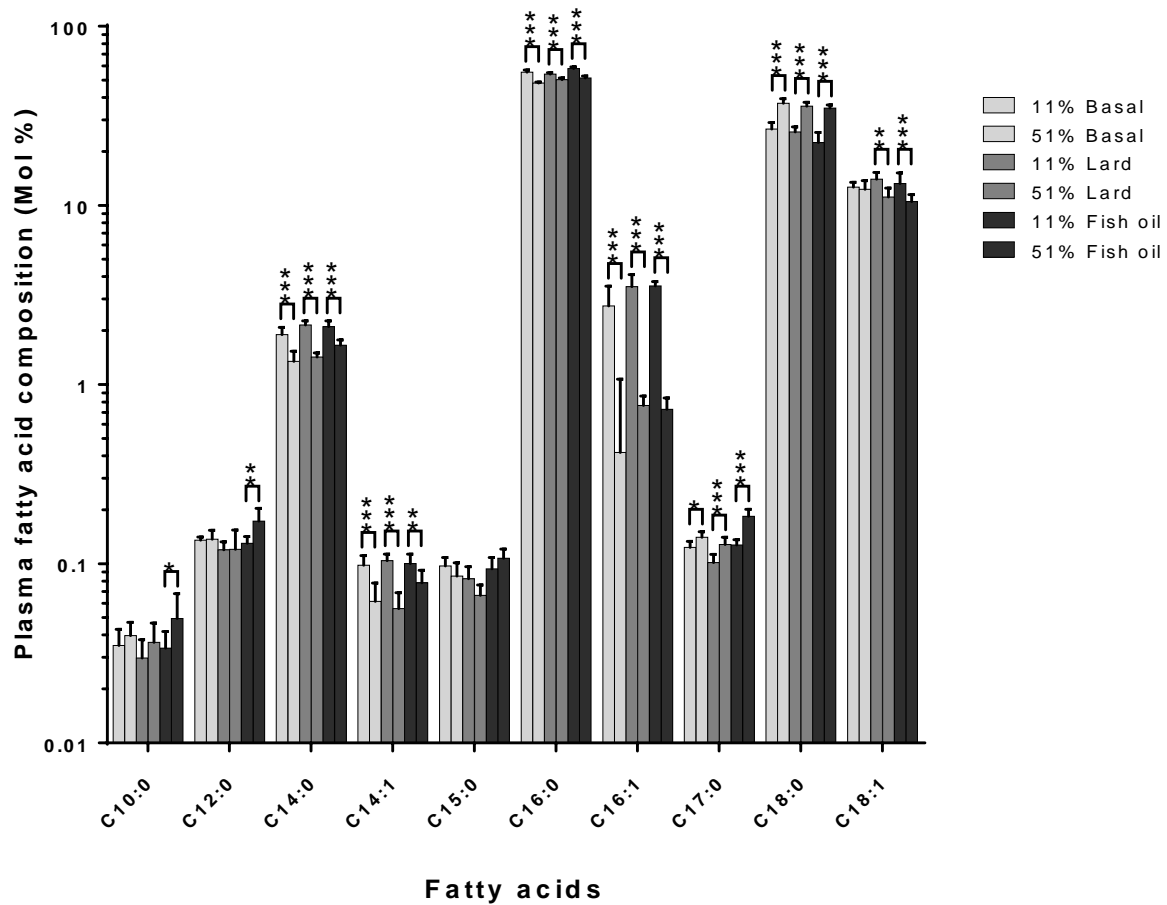

*Figure S2; The effect of changing the amount of total-fat within the diet (% energy) from 11% to 51% on the plasma fatty acid relative compositions (mol %) across three different formulations of dietary fat (Basal, Lard, and Fish oil) (n = 6-8 per group). This is to see if the amount of total-fat within the diet influences the plasma fatty acid composition independent of the dietary fatty acid composition. The plasma samples were analysed by gas chromatography separation with mass spectrometry detection. The significance of the difference between each group is shown by the p-value star system; where  $p \leq 0.05$  was considered significant ( $p < 0.05 = *$ ,  $p < 0.01 = **$ ,  $p < 0.001 = ***$ ). Error bars represent  $\pm$  standard error of the mean.*

**Table S1:** The circulating fatty acid composition (mol %) changes with an increase in dietary total-fat.

*Table S1; The effect of changing the amount of total-fat within the diet on the circulating fatty acid composition (mol %) whilst maintaining identical dietary fatty acid compositions across the experimental diets (n = 6-8 per group). This is to see if the amount of total-fat within the diet influences the circulating fatty acid composition independent of the actual dietary fatty acid composition. The samples were analysed by gas chromatography separation with mass spectrometry detection. Values  $\pm$  standard error of the mean. \* denotes statistically significant change.*

| Study | Group        | n= | C10:0              | C12:0              | C14:0              | C14:1              | C15:0              | C16:0               | C16:1              | C17:0              | C18:0               | C18:1               |
|-------|--------------|----|--------------------|--------------------|--------------------|--------------------|--------------------|---------------------|--------------------|--------------------|---------------------|---------------------|
| 1     | 5%           | 7  | 0.282 $\pm$ 0.043  | 0.211 $\pm$ 0.049  | 3.205 $\pm$ 1.169  | 0.104 $\pm$ 0.041  | 0.126 $\pm$ 0.022  | 51.870 $\pm$ 5.007  | 2.837 $\pm$ 1.126  | 0.128 $\pm$ 0.014  | 31.814 $\pm$ 3.015  | 9.424 $\pm$ 2.173   |
| 1     | 35%          | 7  | 0.248 $\pm$ 0.023  | 0.181 $\pm$ 0.024  | 2.037 $\pm$ 0.250* | 0.057 $\pm$ 0.004* | 0.087 $\pm$ 0.013* | 51.895 $\pm$ 1.106  | 0.697 $\pm$ 0.325* | 0.143 $\pm$ 0.014  | 35.218 $\pm$ 2.100* | 9.437 $\pm$ 1.912   |
| 1     | 70%          | 6  | 0.267 $\pm$ 0.028  | 0.170 $\pm$ 0.015  | 1.212 $\pm$ 0.103* | 0.037 $\pm$ 0.004* | 0.062 $\pm$ 0.003* | 50.057 $\pm$ 1.012* | 0.081 $\pm$ 0.035* | 0.150 $\pm$ 0.018  | 36.601 $\pm$ 2.399  | 11.361 $\pm$ 2.850  |
| 2     | 11% Basal    | 6  | 0.035 $\pm$ 0.008  | 0.135 $\pm$ 0.006  | 1.903 $\pm$ 0.186  | 0.098 $\pm$ 0.013  | 0.097 $\pm$ 0.011  | 55.499 $\pm$ 1.513  | 2.745 $\pm$ 0.796  | 0.123 $\pm$ 0.010  | 26.693 $\pm$ 2.342  | 12.671 $\pm$ 0.805  |
| 2     | 51% Basal    | 8  | 0.04 $\pm$ 0.007   | 0.137 $\pm$ 0.017  | 1.348 $\pm$ 0.188* | 0.062 $\pm$ 0.016* | 0.085 $\pm$ 0.016  | 48.243 $\pm$ 0.549* | 0.419 $\pm$ 0.652* | 0.141 $\pm$ 0.010* | 37.208 $\pm$ 2.234* | 12.318 $\pm$ 1.446  |
| 2     | 11% Lard     | 8  | 0.03 $\pm$ 0.008   | 0.120 $\pm$ 0.013  | 2.155 $\pm$ 0.110  | 0.104 $\pm$ 0.009  | 0.082 $\pm$ 0.014  | 54.100 $\pm$ 0.950  | 3.527 $\pm$ 0.584  | 0.101 $\pm$ 0.011  | 25.746 $\pm$ 1.688  | 14.035 $\pm$ 1.249  |
| 2     | 51% Lard     | 7  | 0.036 $\pm$ 0.01   | 0.120 $\pm$ 0.034  | 1.426 $\pm$ 0.075* | 0.056 $\pm$ 0.013* | 0.067 $\pm$ 0.009  | 50.431 $\pm$ 1.075* | 0.764 $\pm$ 0.099* | 0.128 $\pm$ 0.012* | 35.833 $\pm$ 1.837* | 11.138 $\pm$ 1.347* |
| 2     | 11% Fish oil | 8  | 0.034 $\pm$ 0.008  | 0.130 $\pm$ 0.012  | 2.106 $\pm$ 0.161  | 0.100 $\pm$ 0.013  | 0.094 $\pm$ 0.015  | 58.158 $\pm$ 1.099  | 3.552 $\pm$ 0.202  | 0.127 $\pm$ 0.009  | 22.452 $\pm$ 3.142  | 13.247 $\pm$ 1.967  |
| 2     | 51% Fish oil | 8  | 0.050 $\pm$ 0.019* | 0.173 $\pm$ 0.031* | 1.658 $\pm$ 0.116* | 0.078 $\pm$ 0.014* | 0.107 $\pm$ 0.013  | 51.510 $\pm$ 1.276* | 0.728 $\pm$ 0.115* | 0.184 $\pm$ 0.017* | 34.99 $\pm$ 1.342*  | 10.522 $\pm$ 0.972* |

**Table S2:** The circulating fatty acid concentration ( $\mu\text{mol}$ ) changes with an increase in dietary total-fat.

*Table S2; The effect of changing the amount of total-fat within the diet on the circulating fatty acid concentrations ( $\mu\text{mol}$ ) whilst maintaining identical dietary fatty acid compositions across the experimental diets ( $n = 6-8$  per group). This is to see if the amount of total-fat within the diet influences the circulating fatty acid composition independent of the actual dietary fatty acid composition. The samples were analysed by gas chromatography separation with mass spectrometry detection. Values  $\pm$  standard error of the mean. \* denotes statistically significant change.*

| Study | Group        | n= | C10:0             | C12:0              | C14:0               | C14:1              | C15:0              | C16:0                   | C16:1                | C17:0              | C18:0                 | C18:1                 |
|-------|--------------|----|-------------------|--------------------|---------------------|--------------------|--------------------|-------------------------|----------------------|--------------------|-----------------------|-----------------------|
| 1     | 5%           | 7  | 8.003 $\pm$ 1.648 | 6.170 $\pm$ 2.301  | 97.276 $\pm$ 51.193 | 3.154 $\pm$ 1.747  | 3.666 $\pm$ 1.165  | 1480.840 $\pm$ 295.240  | 86.424 $\pm$ 47.440  | 3.698 $\pm$ 0.965  | 906.615 $\pm$ 163.796 | 275.565 $\pm$ 100.404 |
| 1     | 35%          | 7  | 6.816 $\pm$ 0.452 | 4.998 $\pm$ 0.869  | 56.743 $\pm$ 12.349 | 1.569 $\pm$ 0.233* | 2.431 $\pm$ 0.500* | 1435.370 $\pm$ 169.906  | 19.780 $\pm$ 11.358* | 3.979 $\pm$ 0.666  | 973.550 $\pm$ 121.588 | 264.571 $\pm$ 71.300  |
| 1     | 70%          | 6  | 7.023 $\pm$ 1.071 | 4.506 $\pm$ 0.785  | 30.966 $\pm$ 4.917* | 0.918 $\pm$ 0.222* | 1.580 $\pm$ 0.233* | 1302.439 $\pm$ 147.839  | 1.871 $\pm$ 1.012*   | 3.986 $\pm$ 0.835  | 964.247 $\pm$ 107.531 | 283.341 $\pm$ 97.865  |
| 2     | 11% Basal    | 6  | 0.563 $\pm$ 0.131 | 2.209 $\pm$ 0.365  | 31.057 $\pm$ 5.577  | 1.586 $\pm$ 0.247  | 1.583 $\pm$ 0.317  | 905.889 $\pm$ 149.429   | 45.063 $\pm$ 14.474  | 1.998 $\pm$ 0.277  | 432.443 $\pm$ 58.813  | 207.035 $\pm$ 38.358  |
| 2     | 51% Basal    | 8  | 0.564 $\pm$ 0.112 | 1.941 $\pm$ 0.396  | 19.373 $\pm$ 2.711* | 0.888 $\pm$ 0.235* | 1.228 $\pm$ 0.202* | 694.203 $\pm$ 96.351*   | 6.091 $\pm$ 1.863*   | 2.022 $\pm$ 0.319  | 532.157 $\pm$ 44.059* | 178.396 $\pm$ 37.623  |
| 2     | 11% Lard     | 8  | 0.590 $\pm$ 0.100 | 2.399 $\pm$ 0.311  | 43.536 $\pm$ 6.532  | 2.091 $\pm$ 0.352  | 1.643 $\pm$ 0.252  | 1090.292 $\pm$ 107.886* | 71.709 $\pm$ 17.457  | 2.040 $\pm$ 0.264  | 516.889 $\pm$ 51.562  | 283.970 $\pm$ 48.046  |
| 2     | 51% Lard     | 7  | 0.561 $\pm$ 0.063 | 1.920 $\pm$ 0.444* | 22.852 $\pm$ 5.751* | 0.878 $\pm$ 0.167* | 1.035 $\pm$ 0.193* | 803.398 $\pm$ 156.435   | 12.459 $\pm$ 4.957*  | 2.029 $\pm$ 0.324  | 565.145 $\pm$ 83.176  | 181.141 $\pm$ 62.088* |
| 2     | 11% Fish oil | 8  | 0.648 $\pm$ 0.110 | 2.528 $\pm$ 0.332  | 41.297 $\pm$ 7.000  | 1.980 $\pm$ 0.439  | 1.853 $\pm$ 0.502  | 1146.430 $\pm$ 225.918* | 70.903 $\pm$ 23.544  | 2.498 $\pm$ 0.471  | 437.915 $\pm$ 59.997  | 263.028 $\pm$ 67.454  |
| 2     | 51% Fish oil | 8  | 0.559 $\pm$ 0.209 | 1.941 $\pm$ 0.264* | 18.718 $\pm$ 1.388* | 0.885 $\pm$ 0.156* | 1.210 $\pm$ 0.151* | 582.713 $\pm$ 46.481    | 8.208 $\pm$ 1.304*   | 2.083 $\pm$ 0.226* | 395.231 $\pm$ 23.734  | 119.017 $\pm$ 14.294* |

**Table S3:** The circulating fatty acid composition (mol %) changes between an ethanol treated group and an associated control group.

*Table S3; The serum fatty acid composition (mol %) of the ethanol treated Sprague-Dawley rats (EtOH) and the associated control group (Control) measured by gas chromatography separation with mass spectrometry detection following an intragastric cannula feeding experiment where either group received 35% corn oil or 35% corn oil with 39% ethanol (as percentage of total energy, ethanol was isocalorically substituted for carbohydrate calories; additionally, protein, vitamin, and mineral contents were identical in all diets). The significance of the difference between the two groups is shown by the p-value. A value of  $p \leq 0.05$  was considered significant. Results are shown with  $\pm$  standard error of the mean. (n = 7 per group; male).*

|       | Control group<br>(mol %) | EtOH group<br>(mol %) | p-value |
|-------|--------------------------|-----------------------|---------|
| C10:0 | 0.202 $\pm$ 0.010        | 0.223 $\pm$ 0.017     | >0.1    |
| C12:0 | 0.147 $\pm$ 0.006        | 0.149 $\pm$ 0.006     | >0.1    |
| C14:0 | 1.652 $\pm$ 0.071        | 1.351 $\pm$ 0.042     | 0.003   |
| C14:1 | 0.046 $\pm$ 0.002        | 0.039 $\pm$ 0.002     | 0.020   |
| C15:0 | 0.071 $\pm$ 0.003        | 0.058 $\pm$ 0.003     | 0.014   |
| C16:0 | 42.173 $\pm$ 0.855       | 39.733 $\pm$ 0.560    | 0.034   |
| C16:1 | 0.565 $\pm$ 0.095        | 0.343 $\pm$ 0.063     | 0.077   |
| C17:0 | 0.116 $\pm$ 0.004        | 0.112 $\pm$ 0.004     | >0.1    |
| C18:0 | 28.657 $\pm$ 1.014       | 29.880 $\pm$ 1.012    | >0.1    |
| C18:1 | 7.615 $\pm$ 0.471        | 7.324 $\pm$ 0.482     | >0.1    |
| C18:2 | 18.755 $\pm$ 1.271       | 20.787 $\pm$ 0.901    | >0.1    |
